# Supplementary material for: Ultrafine transition metal dichalcogenide nanodots prepared by polyvinylpyrrolidone-assisted liquid phase exfoliation
Source: Royal Society of Chemistry journal article supplement (doi:10.1039/c7tb00091j), 2017-01-01
Supplement: c7tb00091j1.pdf [file c7tb00091j1.pdf]

## Supporting information

### **Ultrafine Transition Metal Dichalcogenides Nanodots Prepared by Polyvinylpyrrolidone -assisted Liquid Phase Exfoliation**

Shan Zhang,<sup>ab</sup> Jing Li<sup>\*a</sup> and Erkang Wang<sup>\*a</sup>

a. State Key Laboratory of Electroanalytical Chemistry, Changchun Institute of Applied Chemistry, Chinese Academy of Sciences, Changchun, Jilin, 130022, P. R. China. E-mail: ekwang@ciac.ac.cn; Tel: +86-431-85262003

b. University of Science and Technology of China, Hefei, Anhui, 230029, P. R. China.

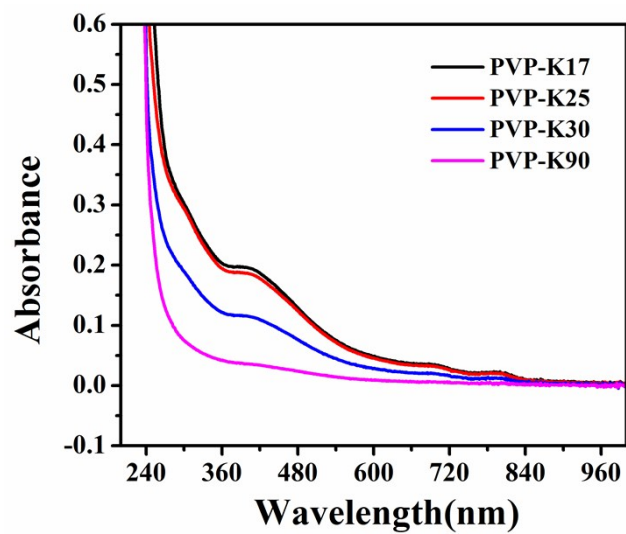

Figure S1. UV-vis spectra of MoSe<sub>2</sub>-PVP dispersions exfoliated by PVP of different average molecular weight.

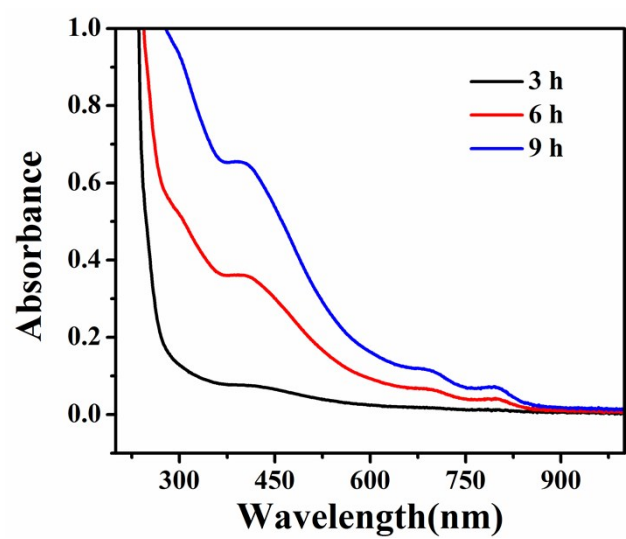

Figure S2. UV-vis spectra of MoSe<sub>2</sub>-PVP dispersions in the presence of PVP-K17 obtained by different sonication time.

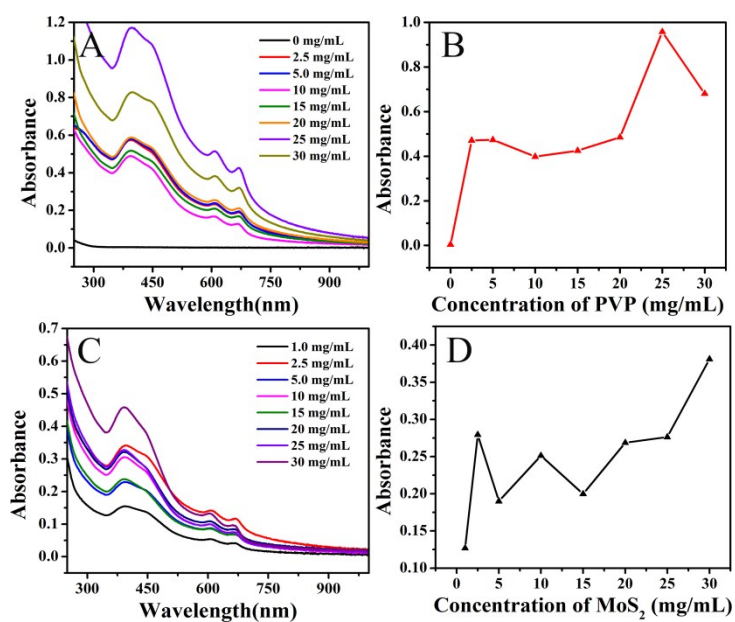

Figure S3. UV-vis absorption spectra of (A) certain amount of MoS<sub>2</sub> (2.5 mg/mL) obtained by sonication in various concentrations of PVP-K17, and (C) different concentrations of MoS<sub>2</sub> dispersions in the presence of certain amount of PVP-K17 (25 mg/mL). The tendency between UV-vis absorption of MoS<sub>2</sub>-PVP dispersions located at 345 nm and various concentrations of PVP-K17 (B) and initial MoS<sub>2</sub> powder (D).

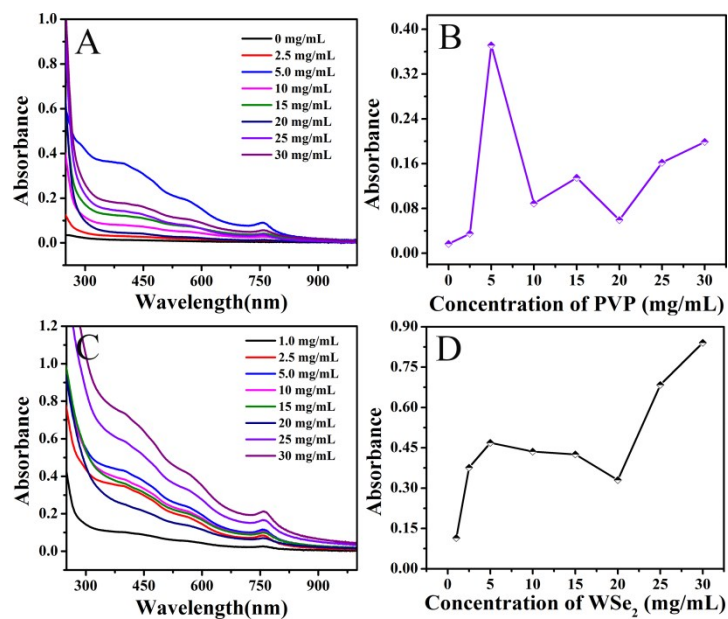

Figure S4. UV-vis absorption spectra of (A) certain amount of WSe<sub>2</sub> (2.5 mg/mL) obtained by sonication in various concentrations of PVP-K17, and (C) different concentrations of WSe<sub>2</sub> dispersion in the presence of certain amount of PVP-K17 (5 mg/mL). The tendency between UV-vis absorption of WSe<sub>2</sub>-PVP dispersions located at 335 nm and various concentrations of PVP-K17 (B) and initial WSe<sub>2</sub> powder (D).

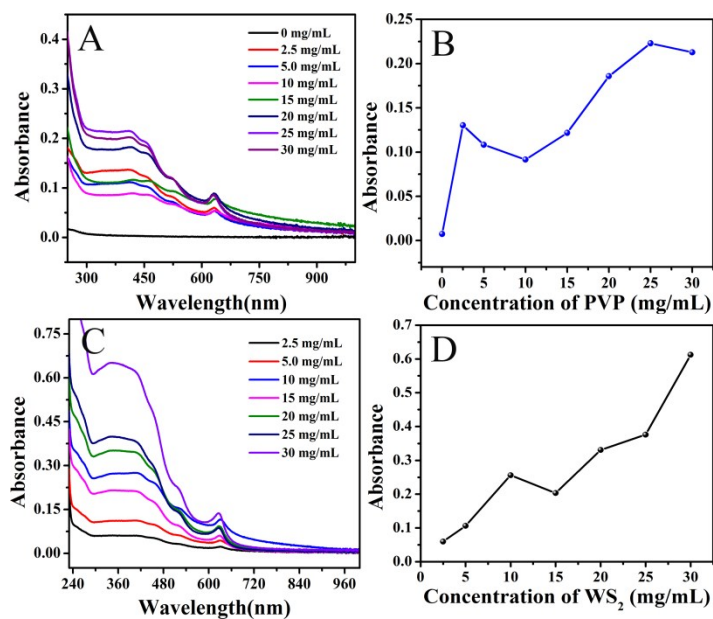

Figure S5. UV-vis absorption spectra of (A) certain amount of WS<sub>2</sub> (2.5 mg/mL) obtained by sonication in various concentrations of PVP-K17, and (C) different concentrations of WS<sub>2</sub> dispersion in the presence of certain amount of PVP-K17 (25 mg/mL). The tendency between UV-vis absorption of WS<sub>2</sub>-PVP dispersions located at 295 nm and various concentrations of PVP-K17 (B) and initial WS<sub>2</sub> powder (D).

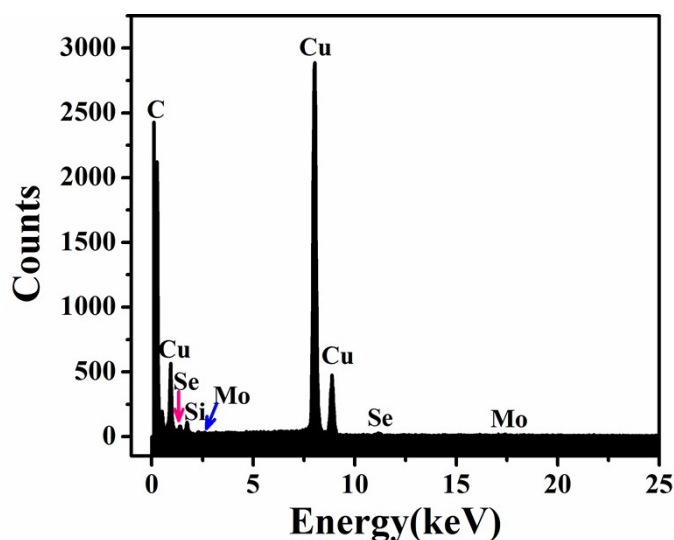

Figure S6. TEM-EDX pattern of MoSe<sub>2</sub>-PVP nanocomposites.

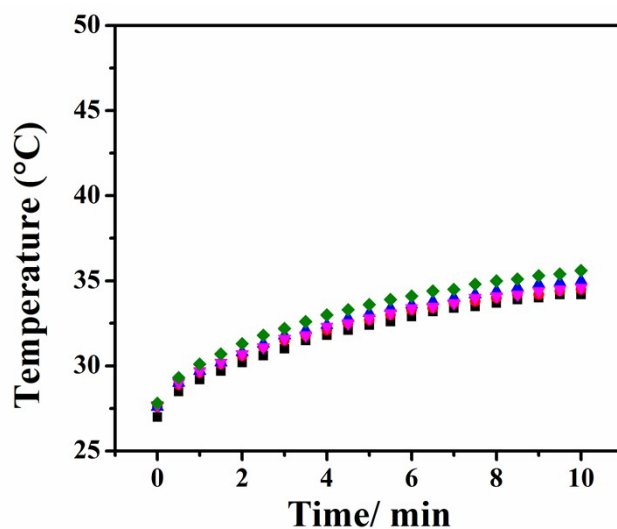

Figure S7. Photothermal heating curve of pure PVP-K17 with the same concentration as that in Figure 6A in the main text.

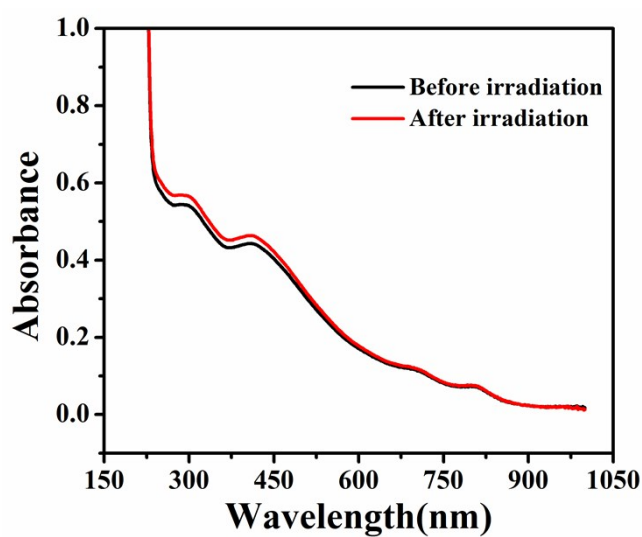

Figure S8. UV-vis spectra of MoSe<sub>2</sub>-PVP dispersion (100 µg/mL) before and after 808 nm laser irradiation for successive six cycles with an on-and-off laser irradiation.

Table S1. Summary of the optimal concentrations of PVP-K17 and bulk crystal.

|                   | Concentration of PVP<br>(mg/mL) | Concentration of bulk crystal<br>(mg/mL) |
|-------------------|---------------------------------|------------------------------------------|
| MoSe <sub>2</sub> | 20                              | 15                                       |
| MoS <sub>2</sub>  | 25                              | 2.5                                      |
| WSe <sub>2</sub>  | 5                               | 5                                        |
| WS <sub>2</sub>   | 25                              | 10                                       |
